# Supplementary material for: IL-17A and TNF Modulate Normal Human Spinal Entheseal Bone and Soft Tissue Mesenchymal Stem Cell Osteogenesis, Adipogenesis, and Stromal Function
Source: PubMed Central journal article supplement (PMC7915379; doi:10.3390/cells10020341), 2021-02-06
Supplement: cells-10-00341-s001.pdf [file cells-10-00341-s001.pdf]

## Supplementary Materials

**Table S1.** Complete list of flow cytometry antibodies used.

| Target: | Clone:   | Manufacturer:                               |
|---------|----------|---------------------------------------------|
| CD3     | UCHT1    | BD Biosciences, San Jose, CA, USA           |
| CD4     | RPA-T4   | BD Biosciences, San Jose, CA, USA           |
| CD8     | SK1      | BD Biosciences, San Jose, CA, USA           |
| CD14    | REA599   | Miltenyi Biotec, Bergisch Gladbach, Germany |
| CD19    | HIB19    | BD Biosciences, San Jose, CA, USA           |
| CD34    | 563      | BD Biosciences, San Jose, CA, USA           |
| CD45    | HI30     | BD Biosciences, San Jose, CA, USA           |
| CD73    | AD2      | Miltenyi Biotec, Bergisch Gladbach, Germany |
| CD90    | F15-42-1 | Bio-rad laboratories, Watford, UK           |
| CD105   | REA794   | Miltenyi Biotec, Bergisch Gladbach, Germany |
| HLA-DR  | L243     | BD Biosciences, San Jose, CA, USA           |
| CCR6    | 11A9     | BD Biosciences, San Jose, CA, USA           |

**Table S2.** Complete list of TaqMan Assays used for analysis of gene expression.

| Gene:          | Gene Name:                                       | Assay ID:     |
|----------------|--------------------------------------------------|---------------|
| <i>ABCA1</i>   | ATP binding cassette subfamily A member 1        | Hs01059137_m1 |
| <i>ABCG1</i>   | ATP binding cassette subfamily G member 1        | Hs00245154_m1 |
| <i>SLC25A4</i> | Solute carrier family 25 member 4                | Hs00154037_m1 |
| <i>SLC2A4</i>  | Solute carrier family 2 member 4                 | Hs00168966_m1 |
| <i>GSK3B</i>   | Glycogen synthase kinase 4 beta                  | Hs00275656_m1 |
| <i>SCARB1</i>  | Scavenger receptor class B receptor 1            | Hs00969821_m1 |
| <i>LRP1</i>    | LDL receptor related protein 1                   | Hs00233856_m1 |
| <i>LEP</i>     | Leptin                                           | Hs00174877_m1 |
| <i>LEPR</i>    | Leptin receptor                                  | Hs00174492_m1 |
| <i>LPL</i>     | Lipoprotein lipase                               | Hs00173425_m1 |
| <i>ADIPOQ</i>  | Adiponectin                                      | Hs00605917_m1 |
| <i>AGPAT2</i>  | 1-acylglycerol-3-phosphate O-acyltransferase 2   | Hs00944961_m1 |
| <i>FABP4</i>   | Fatty acid binding protein 4                     | Hs00609791_m1 |
| <i>PPARG</i>   | Peroxisome proliferator activated receptor gamma | Hs01115513_m1 |
| <i>CEBPA</i>   | CCAAT/enhancer binding protein alpha             | Hs00269972_s1 |
| <i>CEBPB</i>   | CCAAT/enhancer binding protein beta              | Hs00942496_s1 |
| <i>PREF1</i>   | Pre-adipocyte factor 1                           | Hs00171584_m1 |
| <i>PLIN1</i>   | Perilipin 1                                      | Hs00160173_m1 |
| <i>PLIN5</i>   | Perilipin 5                                      | Hs00965990_m1 |
| <i>CIDEA</i>   | Cell death inducing DFFA like effector A         | Hs00154455_m1 |
| <i>CIDEC</i>   | Cell death inducing DFFA like effector C         | Hs00535724_gH |
| <i>UCP3</i>    | Uncoupling protein 3                             | Hs01106052_m1 |
| <i>CCL8</i>    | C-C motif chemokine ligand 8                     | Hs04187715_m1 |
| <i>CCL20</i>   | C-C motif chemokine ligand 20                    | Hs01011368_m1 |
| <i>CXCL2</i>   | C-X-C motif chemokine ligand 2                   | Hs00601975_m1 |
| <i>CXCL12</i>  | C-X-C motif chemokine ligand 12                  | Hs00171022_m1 |
| <i>IL6</i>     | Interleukin 6                                    | Hs00174131_m1 |
| <i>MAPK3</i>   | Mitogen-activated protein kinase 3               | Hs00385075_m1 |
| <i>MAPK1</i>   | Mitogen-activated protein kinase 1               | Hs01046839_m1 |

|                 |                                                     |               |
|-----------------|-----------------------------------------------------|---------------|
| <i>JAK1</i>     | Janus kinase 1                                      | Hs01026983_m1 |
| <i>JAK2</i>     | Janus kinase 2                                      | Hs01078136_m1 |
| <i>JAK3</i>     | Janus kinase 3                                      | Hs00169663_m1 |
| <i>STAT1</i>    | Signal transducer and activator of transcription 1  | Hs01013996_m1 |
| <i>STAT2</i>    | Signal transducer and activator of transcription 2  | Hs01013123_m1 |
| <i>STAT3</i>    | Signal transducer and activator of transcription 3  | Hs00374280_m1 |
| <i>STAT4</i>    | Signal transducer and activator of transcription 4  | Hs01028017_m1 |
| <i>STAT5A</i>   | Signal transducer and activator of transcription 5A | Hs00234181_m1 |
| <i>STAT5B</i>   | Signal transducer and activator of transcription 5B | Hs00273500_m1 |
| <i>STAT6</i>    | Signal transducer and activator of transcription 6  | Hs00598625_m1 |
| <i>IL17RA</i>   | Interleukin 17 receptor A                           | Hs01056316_m1 |
| <i>IL17RB</i>   | Interleukin 17 receptor B                           | Hs00218889_m1 |
| <i>IL17RC</i>   | Interleukin 17 receptor C                           | Hs00994305_m1 |
| <i>IL17RD</i>   | Interleukin 17 receptor D                           | Hs00296982_m1 |
| <i>IL17RE</i>   | Interleukin 17 receptor E                           | Hs00979824_m1 |
| <i>TNF</i>      | Tumour necrosis factor                              | Hs99999043_m1 |
| <i>TNFRSF1A</i> | TNF Receptor Superfamily Member 1A                  | Hs01042313_m1 |
| <i>TNFRSF1B</i> | TNF Receptor Superfamily Member 1B                  | Hs00153550_m1 |
| <i>CCR6</i>     | C-C motif chemokine receptor 6                      | Hs00171121_m1 |
| <i>HPRT</i>     | Hypoxanthine phosphoribosyltransferase 1            | Hs99999909_m1 |
| <i>DKK-1</i>    | Dickkopf-Related Protein 1                          | Hs00183740_m1 |
| <i>RUNX2</i>    | Runt-related transcription factor 2                 | Hs00231692_m1 |

**Table S3.** List of samples used for each experiment.

| <b>Sample ID:</b> | <b>Age:</b> | <b>Sex:</b> | <b>Application:</b>                                         |
|-------------------|-------------|-------------|-------------------------------------------------------------|
| RC121             | 69          | Male        | Chondrogenesis, Adipogenesis                                |
| RC123             | 83          | Male        | Chondrogenesis, Adipogenesis                                |
| RC143             | 43          | Male        | Flow Cytometry                                              |
| RC151             | 66          | Female      | Flow Cytometry                                              |
| RC152             | 24          | Female      | Flow Cytometry                                              |
| RC153             | 68          | Female      | Flow Cytometry                                              |
| RC154             | 78          | Male        | Flow Cytometry                                              |
| RC160             | 56          | Female      | Flow Cytometry                                              |
| RC183             | 69          | Male        | Flow Cytometry                                              |
| RC184             | 47          | Male        | Flow Cytometry                                              |
| RC210             | 71          | Male        | Flow Cytometry                                              |
| RC211             | 80          | Female      | Flow Cytometry                                              |
| RC212             | 18          | Female      | Colony Forming Unit (CFU), Flow Cytometry                   |
| RC217             | 66          | Female      | Osteogenesis, Chondrogenesis, Adipogenesis                  |
| RC219             | 68          | Male        | Osteogenesis, CFU, Osteogenesis + Cytokines                 |
| RC220             | 75          | Female      | CFU                                                         |
| RC221             | 80          | Female      | Osteogenesis, CFU, Flow Cytometry, Osteogenesis + Cytokines |
| RC222             | 12          | Female      | Adipogenesis + Cytokines, Osteogenesis + Cytokines          |
| RC223             | 19          | Female      | Osteogenesis, Adipogenesis + Cytokines                      |
| RC224             | 13          | Female      | Osteogenesis, CFU, Chondrogenesis, Adipogenesis             |
| RC229             | 12          | Female      | CFU, Adipogenesis + Cytokines                               |
| RC232             | 68          | Female      | Flow Cytometry                                              |
| RC234             | 20          | Female      | Osteogenesis, CFU, Osteogenesis + Cytokines                 |
| RC241             | 15          | Male        | CFU                                                         |

|       |    |        |                                                                           |
|-------|----|--------|---------------------------------------------------------------------------|
| RC242 | 23 | Male   | CFU, Osteogenesis + Cytokines                                             |
| RC250 | 68 | Female | Osteogenesis, CFU, Flow Cytometry                                         |
| RC265 | 67 | Male   | Osteogenesis, CFU, Flow Cytometry, Adipogenesis, Osteogenesis + Cytokines |
| RC300 | 14 | Female | Osteogenesis + Cytokines                                                  |
| RC303 | 83 | Male   | Osteogenesis, CFU, Osteogenesis + Cytokines                               |
| RC311 | 49 | Male   | CFU                                                                       |
| RC312 | 13 | Male   | CFU                                                                       |
| RC313 | 63 | Male   | CFU, Adipogenesis, Osteogenesis + Cytokines                               |
| RC317 | 66 | Male   | Osteogenesis, Adipogenesis + Cytokines, Osteogenesis + Cytokines          |
| RC359 | 64 | Female | Adipogenesis + Cytokines, Osteogenesis + Cytokines                        |
| RC380 | 15 | Female | CFU, Adipogenesis Time Course, Osteogenesis + Cytokines, Flow Cytometry   |
| RC391 | 14 | Female | Adipogenesis Time Course, Osteogenesis + Cytokines,                       |
| RC393 | 53 | Female | Adipogenesis Time Course, Osteogenesis + Cytokines,                       |
| RC394 | 74 | Male   | Adipogenesis Time Course                                                  |

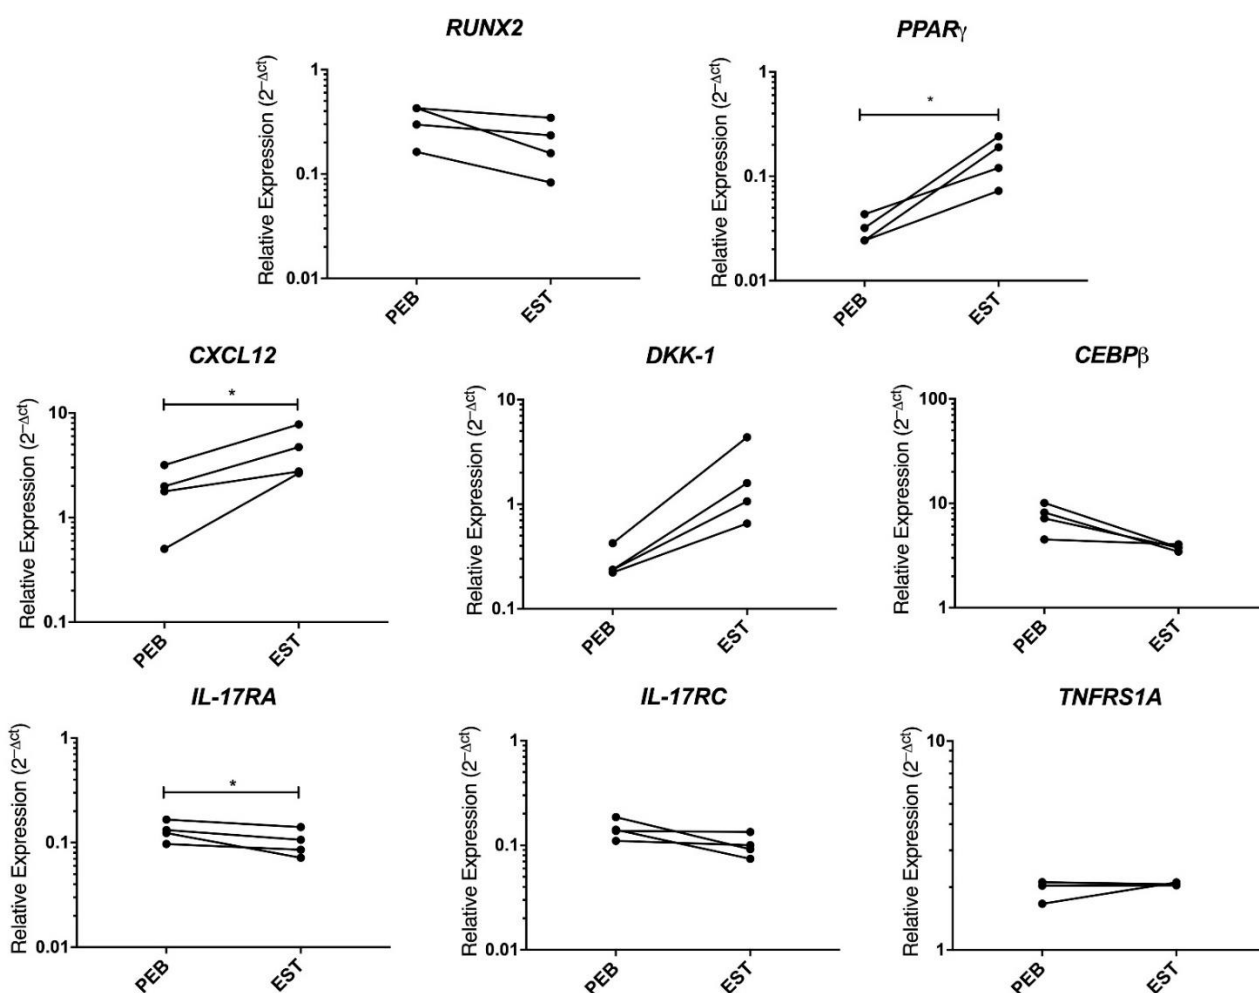

**Figure S1.** Gene transcript expression for transcripts relating to osteogenesis, adipogenesis and stromal function in undifferentiated mesenchymal stem cells (MSCs) from both peri-enthesal bone (PEB) and enthesal soft tissue (EST) ( $n = 4$ ). EST MSCs showed significantly higher expression of peroxisome proliferator-activated receptor gamma ( $PPAR\gamma$ ) ( $p < 0.05$ ) and Stromal cell-derived factor-1 ( $CXCL12$ ) ( $p < 0.05$ ). With transcripts associated with enhanced osteogenesis in Runt-related transcription factor 2 ( $RUNX2$ ) being more expressed in PEB MSCs compared to match EST MSCs, though this was not significant. \* =  $p < 0.05$ .

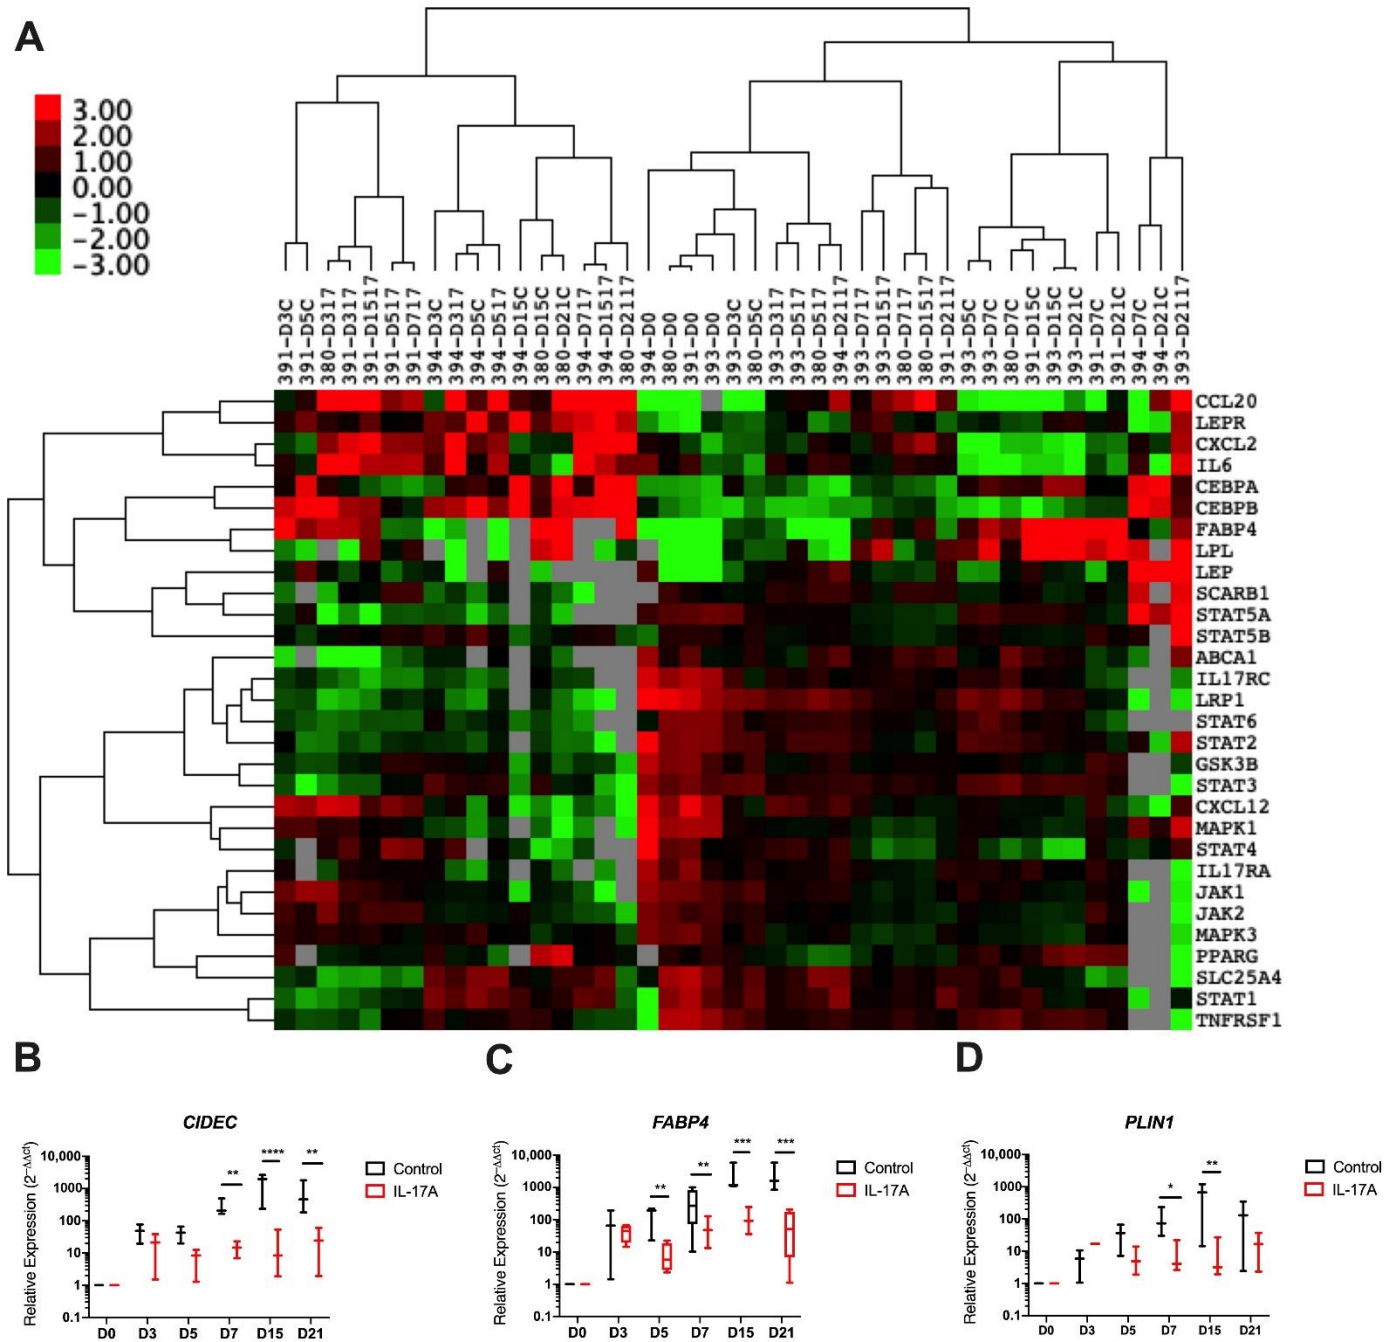

**Figure S2.** (A) Hierarchical clustering of peri-enthesal bone (PEB) mesenchymal stem cells (MSCs) is absent due to Table 75. of total values were detectable. Colour denotes relative expression to Hypoxanthine Phosphoribosyltransferase 1 (*HPRT1*), green-low, black-equal, red-higher, grey-below detection. Numbers denote sample ID, D-days in culture though fusion proteins Cell Death Inducing DFFA like Effector C (*CIDECD*) (B) and Perilipin-1 (*Plin1*) (D) all showed significant downregulating at various time points when stimulated by IL-17A. This was also true for Fatty Acid-Binding Protein 4 (*FABP4*) (C) showing downregulation by IL-17A from day 5 of PEB adipogenesis. \* =  $p < 0.05$ , \*\* =  $p < 0.01$ , \*\*\* =  $p < 0.001$ , \*\*\*\* =  $p < 0.0001$ .
